# Supplementary material for: Reduced Incidence and Better Liver Disease Outcomes among Chronic HCV Infected Patients Who Consume Cannabis
Source: PubMed Central journal article supplement (PMC6174743; doi:10.1155/2018/9430953), 2018-09-23
Supplement: 9430953.f1.pdf [file 9430953.f1.pdf]

## Supplementary tables

**Table S1**

| n                          | No Cannabis use<br>182587<br>(~887,975) | Cannabis use<br>4774<br>(~23,371) | p-value |
|----------------------------|-----------------------------------------|-----------------------------------|---------|
| Liver cirrhosis            | 23.73                                   | 8.49                              | <0.0001 |
| Ascites                    | 11.25                                   | 2.77                              | <0.0001 |
| Variceal bleeding          | 4.56                                    | 1.58                              | <0.0001 |
| Hepatorenal syndrome       | 1.48                                    | 0.38                              | <0.0001 |
| Hepatic encephalopathy     | 1.45                                    | 0.40                              | <0.0001 |
| Portal hypertension        | 7.03                                    | 2.11                              | <0.0001 |
| Jaundice                   | 0.83                                    | 0.32                              | <0.0001 |
| Baveno 4 scoring           |                                         |                                   | <0.0001 |
| 0: No cirrhosis            | 76.27                                   | 91.51                             |         |
| 1: Compensated cirrhosis   | 10.60                                   | 4.67                              |         |
| 2: Decompensated cirrhosis | 13.13                                   | 3.82                              |         |
| Mortality                  | 3.93                                    | 0.03                              | <0.0001 |
| Liver cancer               | 4.54                                    | 1.04                              | <0.0001 |
| Discharge disposition      |                                         |                                   | <0.0001 |
| Favourable discharge       | 77.12                                   | 83.23                             |         |
| Unfavourable discharge     | 22.88                                   | 16.77                             |         |

**Table S1: Outcome characteristics by cannabis use status, before propensity matching**

**Table S2**

|                             | <b>No Cannabis<br/>use</b> | <b>Cannabis<br/>use</b> | <b>p-value</b> |
|-----------------------------|----------------------------|-------------------------|----------------|
| n (~weighted)               | 4728                       | 4728                    |                |
| Age, mean (SD)              | 40.41 (13.12)              | 40.62<br>(12.98)        | 0.4678         |
| Gender                      |                            |                         | 0.3784         |
| Male                        | 53.72                      | 54.72                   |                |
| Female                      | 46.28                      | 45.28                   |                |
| Race                        |                            |                         | 0.974          |
| White                       | 66.54                      | 66.46                   |                |
| Black                       | 19.37                      | 19.14                   |                |
| Hispanics                   | 10.11                      | 10.38                   |                |
| Others                      | 3.98                       | 4.02                    |                |
| Health insurance            |                            |                         | 0.461          |
| Medicare                    | 19.75                      | 21.04                   |                |
| Medicaid                    | 47.08                      | 45.94                   |                |
| Private                     | 12.56                      | 12.14                   |                |
| Self-pay & others           | 20.60                      | 20.88                   |                |
| Income                      |                            |                         | 0.4098         |
| Lowest Quartile             | 47.19                      | 45.71                   |                |
| Second Quartile             | 25.51                      | 25.34                   |                |
| Third Quartile              | 17.58                      | 18.65                   |                |
| Highest Quartile            | 9.73                       | 10.30                   |                |
| Hospital region             |                            |                         | 0.9886         |
| NorthEast                   | 10.26                      | 10.30                   |                |
| Midwest                     | 33.23                      | 33.35                   |                |
| South                       | 56.51                      | 56.35                   |                |
| West                        |                            |                         |                |
| Hospital teaching status    |                            |                         | 0.4856         |
| Rural                       | 22.97                      | 22.46                   |                |
| Urban non-teaching          | 14.26                      | 14.89                   |                |
| Urban teaching              | 40.84                      | 39.68                   |                |
| Urban teaching              | 21.93                      | 22.97                   |                |
| Peripheral vascular disease | 0.82                       | 1.06                    | 0.2444         |
| Congestive heart failure    | 2.56                       | 2.60                    | 0.8976         |
| Hypertension                | 21.85                      | 22.34                   | 0.5962         |
| Chronic lung disease        | 15.61                      | 16.22                   | 0.4383         |
| Valvular heart disease      | 1.99                       | 1.73                    | 0.3594         |
| Cardiac arrhythmias         | 4.67                       | 5.22                    | 0.2312         |
| Chronic kidney disease      | 4.12                       | 4.51                    | 0.3869         |
| Cerebral vascular disease   | 2.09                       | 1.73                    | 0.2052         |
| Ischemic heart disease      | 4.95                       | 4.78                    | 0.7077         |

|                       |       |       |        |
|-----------------------|-------|-------|--------|
| Hypothyroidism        | 3.68  | 3.66  | 0.9575 |
| Hyperthyroidism       | 0.53  | 0.38  | 0.2946 |
| Other substance abuse | 65.38 | 65.27 | 0.9369 |
| Malignancies          | 3.17  | 3.57  | 0.3052 |
| AIDS                  | 2.92  | 2.60  | 0.3653 |

**Table S2: Baseline characteristics of chronic hepatitis C infected patients, by cannabis use status (after propensity matching)**

**Table S3**

|                                 | Before propensity matching |      |      |         | After propensity matching |      |      |         |
|---------------------------------|----------------------------|------|------|---------|---------------------------|------|------|---------|
|                                 | aOR                        | LCL  | UCL  | p-value | aOR                       | LCL  | UCL  | p-value |
| <b>Age</b>                      | 0.96                       | 0.96 | 0.96 | <0.0001 | 1.00                      | 0.99 | 1.00 | 0.6176  |
| <b>Female vs. Male</b>          | 0.63                       | 0.59 | 0.68 | <0.0001 | 0.97                      | 0.88 | 1.07 | 0.4998  |
| <b>Race</b>                     |                            |      |      | <0.0001 |                           |      |      | 0.9561  |
| Black vs. White                 | 1.23                       | 1.11 | 1.37 |         | 0.99                      | 0.88 | 1.13 |         |
| Hispanics vs. Whites            | 0.79                       | 0.70 | 0.89 |         | 1.04                      | 0.89 | 1.22 |         |
| Others vs. Whites               | 0.94                       | 0.80 | 1.11 |         | 1.02                      | 0.82 | 1.27 |         |
| <b>Health insurance</b>         |                            |      |      | <0.0001 |                           |      |      | 0.472   |
| Medicare vs. Private            | 1.47                       | 1.31 | 1.64 |         | 1.12                      | 0.95 | 1.31 |         |
| Medicaid vs. Private            | 1.25                       | 1.12 | 1.39 |         | 1.02                      | 0.89 | 1.18 |         |
| Self-pay & others vs. Private   | 1.25                       | 1.10 | 1.43 |         | 1.06                      | 0.90 | 1.24 |         |
| <b>Income status</b>            |                            |      |      | <0.0001 |                           |      |      | 0.4251  |
| Lowest vs. highest quartile     | 1.46                       | 1.29 | 1.65 |         | 0.91                      | 0.77 | 1.06 |         |
| Second vs. highest quartile     | 1.34                       | 1.18 | 1.52 |         | 0.93                      | 0.79 | 1.10 |         |
| Third vs. highest quartile      | 1.24                       | 1.09 | 1.41 |         | 0.99                      | 0.84 | 1.18 |         |
| <b>Hospital teaching status</b> |                            |      |      | <0.0001 |                           |      |      | 0.8936  |
| Urban non-teaching vs. rural    | 0.84                       | 0.72 | 0.98 |         | 0.96                      | 0.82 | 1.13 |         |
| Urban teaching vs. rural        | 0.69                       | 0.60 | 0.81 |         | 0.97                      | 0.83 | 1.14 |         |
| <b>Hospital region</b>          |                            |      |      | <0.0001 |                           |      |      | 0.6246  |
| Midwest vs. NorthEast           | 1.48                       | 1.29 | 1.71 |         | 1.08                      | 0.93 | 1.25 |         |
| South vs. NorthEast             | 1.32                       | 1.15 | 1.51 |         | 1.01                      | 0.89 | 1.14 |         |
| West vs. NorthEast              | 1.60                       | 1.42 | 1.81 |         | 1.06                      | 0.93 | 1.21 |         |
| <b>Comorbidities</b>            |                            |      |      |         |                           |      |      |         |
| Valvular heart disease          | 0.82                       | 0.64 | 1.05 | 0.1136  | 0.86                      | 0.64 | 1.16 | 0.32    |
| Ischemic heart disease          | 1.09                       | 0.93 | 1.27 | 0.2976  | 0.93                      | 0.76 | 1.13 | 0.4678  |
| Chronic kidney disease          | 0.58                       | 0.50 | 0.67 | <0.0001 | 1.07                      | 0.86 | 1.34 | 0.5312  |
| Cardiac arrhythmias             | 0.90                       | 0.79 | 1.04 | 0.1591  | 1.12                      | 0.92 | 1.36 | 0.2524  |
| Chronic lung disease            | 1.18                       | 1.08 | 1.29 | 0.0003  | 1.05                      | 0.93 | 1.18 | 0.4258  |

|                             |      |      |      |         |      |      |      |        |
|-----------------------------|------|------|------|---------|------|------|------|--------|
| Hypertension                | 1.04 | 0.96 | 1.13 | 0.3545  | 1.02 | 0.91 | 1.15 | 0.6856 |
| Congestive heart failure    | 0.75 | 0.62 | 0.90 | 0.0024  | 1.01 | 0.77 | 1.31 | 0.9586 |
| Cerebral vascular disease   | 0.83 | 0.66 | 1.04 | 0.11    | 0.82 | 0.61 | 1.11 | 0.1939 |
| Peripheral vascular disease | 0.90 | 0.67 | 1.20 | 0.4674  | 1.26 | 0.82 | 1.94 | 0.2944 |
| Hypothyroidism              | 0.97 | 0.83 | 1.14 | 0.729   | 0.98 | 0.78 | 1.22 | 0.8417 |
| Hyperthyroidism             | 1.15 | 0.71 | 1.88 | 0.572   | 0.69 | 0.37 | 1.30 | 0.2487 |
| AIDS                        | 0.88 | 0.73 | 1.07 | 0.2044  | 0.88 | 0.68 | 1.14 | 0.3393 |
| Substance abuse             | 6.75 | 6.20 | 7.35 | <0.0001 | 1.01 | 0.90 | 1.14 | 0.8594 |
| Malignancies                | 0.72 | 0.61 | 0.86 | 0.0001  | 1.13 | 0.89 | 1.43 | 0.3241 |
| Year                        | 1.10 | 1.08 | 1.13 | <0.0001 | 1.00 | 0.98 | 1.02 | 0.8109 |

**Table S3: Odds ratio of having cannabis use disorder, before and after propensity matching**

Footnotes: aOR: adjusted odds ratio, LCL & UCL: lower and upper confidence limit.

**Table S4**

|                        | aPRR/aMR | LCL  | UCL    | p-value |
|------------------------|----------|------|--------|---------|
| Liver cancer           | 0.97     | 0.66 | 1.4226 | 0.8613  |
| Inpatient mortality    | 0.95     | 0.67 | 1.3459 | 0.7748  |
| Length of stay         | 1.01     | 0.95 | 1.0733 | 0.7102  |
| Total hospital cost    | 0.91     | 0.83 | 0.9868 | 0.0231  |
| Unfavourable discharge | 0.87     | 0.78 | 0.9593 | 0.0060  |

**Table S4: Comparison of liver disease and outcomes among HCV patients, after including cirrhosis as match predictor**
